# Supplementary material
Source: PubMed Central journal article supplement (PMC1857811)
Supplement: pcbi.0030067.st002.pdf [file pcbi.0030067.st002.pdf]

| Ref. miRNA    | Cluster members                 | Chr     | N      | Positions                                     | Expression pattern of mature miRNA                                                                                      |
|---------------|---------------------------------|---------|--------|-----------------------------------------------|-------------------------------------------------------------------------------------------------------------------------|
| 124a-3        |                                 | 20      | 8      | 7010 8768 8904<br>8977 9048 9095<br>9293 9498 | Brain specific miRNA; Highly expressed during brain development <sup>1,2</sup>                                          |
| 425           | 191                             | 3       | 7      | 754 782 8107 8607<br>8632 8936 9194           | Neurons <sup>3</sup>                                                                                                    |
| 124a-1        |                                 | 8       | 6      | 6254 6601 6624<br>6911 7142 9426              | Brain specific miRNA; Highly expressed during brain development <sup>2</sup>                                            |
| 607           |                                 | 10      | 6      | 5851 5882 6150<br>6171 6208 6659              | Colorectal cancer cells (CC) <sup>4</sup>                                                                               |
| 550-1         |                                 | 7       | 6      | 4797 4976 5014<br>5540 5613 5852              | CC <sup>4</sup>                                                                                                         |
| 132           | 212                             | 17      | 6      | 3202 3883 4127<br>8816 9922 9999              | Highly expressed in brain <sup>5</sup>                                                                                  |
| 96            | 182,<br>183                     | 7       | 6      | 1580 2833 4611<br>4765 4939 6201              | Significantly expressed in dorsal root ganglia <sup>6</sup> (neuronal cells) and embryonic stem cells (ES) <sup>7</sup> |
| 9-2           |                                 | 5       | 6      | 1152 1560 2303<br>2511 2788 2794              | Highly expressed during brain development <sup>3,8</sup>                                                                |
| 559           |                                 | 2       | 6      | 1443 1635 1825<br>2075 2417 2752              | CC <sup>4</sup>                                                                                                         |
| 20a           | 19b-1,92-<br>1,<br>17,19a,18a   | 13      | 5      | 6312 6328 7279<br>7474 7942                   | ES <sup>9</sup> , Highly expressed during development of skin epidermis <sup>10</sup> .                                 |
| 210           |                                 | 11      | 5      | 1460 2336 9447<br>9618 9858                   | Predominantly expressed in Thymus <sup>9</sup> , Abundant in pancreatic-islets (PI) <sup>11</sup>                       |
| 483           |                                 | 11      | 5      | 257 3108 3718<br>4188 4764                    | CC <sup>4</sup>                                                                                                         |
| 486           |                                 | 8       | 5      | 574 580 586 614<br>620                        | Fetal development of liver <sup>12</sup>                                                                                |
| 363           | 18b,106a,<br>20b,19b-2,<br>92-2 | X       | 4      | 6572 7288 7445<br>7754                        | Prenatal embryonic development <sup>8</sup>                                                                             |
| 345           |                                 | 14      | 4      | 8465 8627 8789<br>8858                        | Fetal development of liver <sup>12</sup>                                                                                |
| 378           |                                 | 5       | 4      | 7349 8385 9218<br>9267                        | PI <sup>13</sup>                                                                                                        |
| 129-2         |                                 | 11      | 4      | 4064 8490 8496<br>9884                        | Expressed in cerebellum <sup>1</sup>                                                                                    |
| 181d<br>589   | 181c                            | 19<br>7 | 4<br>4 | 180 902 954 1060<br>4275 4944 4955<br>4989    | Down-regulated in glioblastoma <sup>14</sup><br>CC <sup>4</sup>                                                         |
| 101-1<br>135b |                                 | 1<br>1  | 4<br>4 | 600 952 1001 1834<br>1334 1598 1666<br>2304   | Predominantly expressed in brain <sup>1</sup><br>Expressed in cortical neurons <sup>3</sup>                             |
| 375<br>9-1    |                                 | 2<br>1  | 3<br>3 | 8395 8613 8904<br>8845 8942 9646              | PI specific miRNA <sup>11</sup><br>Highly expressed during brain development <sup>3,8</sup>                             |
| 92b<br>25     | 106b,93                         | 1<br>7  | 3<br>3 | 9528 9535 9812<br>2280 2775 2917              | Abundant in brain <sup>4</sup><br>Widely expressed in ES <sup>9</sup>                                                   |

**Table S2:** miRNA genes that contain atleast 3 occurrences of the motif, CGCGCG within a contiguous stretch of 2 kb in their upstream regions (<10 kb). The locations of the motif (Positions) are with respect to the start of the first 10 kb upstream region of the reference miRNA (Ref. miRNA). The miRNAs for which the upstream regions (Cluster members) overlap with that of the reference miRNA and satisfy the criteria for the occurrences of motifs are noted for clarity. The number of occurrences (N) of the motif upstream of the reference miRNA is also indicated.

#### Reference List

1. Lagos-Quintana, M., Rauhut, R., Yalcin, A., Meyer, J., Lendeckel, W. & Tuschl, T. Identification of tissue-specific microRNAs from mouse. *Curr. Biol.* **12**, 735-739 (2002).
2. Krichevsky, A. M., King, K. S., Donahue, C. P., Khrapko, K. & Kosik, K. S. A microRNA array reveals extensive regulation of microRNAs during brain development. *RNA*. **9**, 1274-1281 (2003).
3. Kim, J., Krichevsky, A., Grad, Y., Hayes, G. D., Kosik, K. S., Church, G. M. & Ruvkun, G. Identification of many microRNAs that copurify with polyribosomes in mammalian neurons. *Proc. Natl. Acad. Sci. U. S. A* **101**, 360-365 (2004).
4. Cummins, J. M., He, Y., Leary, R. J., Pagliarini, R., Diaz, L. A., Jr., Sjoblom, T., Barad, O., Bentwich, Z., Szafranska, A. E., Labourier, E., Raymond, C. K., Roberts, B. S., Juhl, H., Kinzler, K. W., Vogelstein, B. & Velculescu, V. E. The colorectal microRNAome. *Proc. Natl. Acad. Sci. U. S. A* (2006).
5. Sempere, L. F., Freemantle, S., Pitha-Rowe, I., Moss, E., Dmitrovsky, E. & Ambros, V. Expression profiling of mammalian microRNAs uncovers a subset of brain-expressed microRNAs with possible roles in murine and human neuronal differentiation. *Genome Biol.* **5**, R13 (2004).
6. Kloosterman, W. P., Wienholds, E., de, B. E., Kauppinen, S. & Plasterk, R. H. In situ detection of miRNAs in animal embryos using LNA-modified oligonucleotide probes. *Nat. Methods* **3**, 27-29 (2006).
7. Houbaviy, H. B., Murray, M. F. & Sharp, P. A. Embryonic stem cell-specific MicroRNAs. *Dev. Cell* **5**, 351-358 (2003).
8. Mineno, J., Okamoto, S., Ando, T., Sato, M., Chono, H., Izu, H., Takayama, M., Asada, K., Mirochnitchenko, O., Inouye, M. & Kato, I. The expression profile of microRNAs in mouse embryos. *Nucleic Acids Res.* **34**, 1765-1771 (2006).
9. Thomson, J. M., Parker, J., Perou, C. M. & Hammond, S. M. A custom microarray platform for analysis of microRNA gene expression. *Nat. Methods* **1**, 47-53 (2004).
10. Yi, R., O'carroll, D., Pasolli, H. A., Zhang, Z., Dietrich, F. S., Tarakhovsky, A. & Fuchs, E. Morphogenesis in skin is governed by discrete sets of differentially expressed microRNAs. *Nat. Genet.* (2006).
11. Poy, M. N., Eliasson, L., Krutzfeldt, J., Kuwajima, S., Ma, X., Macdonald, P. E., Pfeffer, S., Tuschl, T., Rajewsky, N., Rorsman, P. & Stoffel, M. A pancreatic islet-specific microRNA regulates insulin secretion. *Nature* **432**, 226-230 (2004).
12. Fu, H., Tie, Y., Xu, C., Zhang, Z., Zhu, J., Shi, Y., Jiang, H., Sun, Z. & Zheng, X. Identification of human fetal liver miRNAs by a novel method. *FEBS Lett.* **579**, 3849-3854 (2005).

13. Fernandez-Zapico, M. E., Bramati, P. S., Zakaria, S., Kaczynski, J. A. & Urrutia, R. Fundamentals of transcription factors and their impact on pancreatic development and cancer. *Pancreatology*. **3**, 276-283 (2003).
14. Ciafre, S. A., Galardi, S., Mangiola, A., Ferracin, M., Liu, C. G., Sabatino, G., Negrini, M., Maira, G., Croce, C. M. & Farace, M. G. Extensive modulation of a set of microRNAs in primary glioblastoma. *Biochem. Biophys. Res. Commun.* **334**, 1351-1358 (2005).
